# Supplementary material
Source: PubMed Central journal article supplement (PMC3700274)

## SUPPLEMENTARY TABLES

**Supplementary Table S1. HIV/AIDS estimates in Central America, 2010**

|                                              | Guatemala    | Belize    | El<br>Salvador | Honduras    | Nicaragua   | Costa Rica  | Panama      |
|----------------------------------------------|--------------|-----------|----------------|-------------|-------------|-------------|-------------|
| <b>Total Population</b>                      | 13.6 million | 315,000   | 6.1 million    | 7.9 million | 6.0 million | 4.5 million | 3.4 million |
| <b>Number of people living with HIV/AIDS</b> | 62,000       | 6,000     | 34,000         | 39,000      | 6,900       | 9,800       | 20,000      |
| <b>Number of HIV/ AIDS cases in 2009</b>     | 1,881        | 455       | 1,891          | 1,060       | 866         | 384         | 1,522       |
| <b>Adult HIV prevalence</b>                  | 0.8%         | 2.3%      | 0.8%           | 0.8%        | 0.2%        | 0.3%        | 0.9%        |
| <b>FSW HIV prevalence</b>                    | 3-7.8%       | not known | 5.7%           | 5.5%        | 1.9%        | 0.11%       | 2%          |
| <b>MSM HIV prevalence</b>                    | 11.5-18.3%   | not known | 10.8%          | 9.7%        | 7.9%        | 12.7%       | 10.6%       |
| <b>ART coverage rate in 2009</b>             | 63%          | 57%       | 66%            | 47%         | 62%         | 86%         | 53%         |

Sources: USAID Report: HIV/AIDS profile for the Central American Region, February, 2011. UNGASS Report, Guatemala, 2010. TB, HIV/AIDS and other STs Programme Report, Belize, 2010. MSPAS, El Salvador, 2009. HIV/AIDS National Report, Honduras, June 2010. ECVC, Honduras, 2006. ECVC, Nicaragua, 2009. HIV/AIDS National Report, Costa Rica, 2009. Epidemiological Surveillance MINSAs, MSPAS, Panama, 2010.

**Supplementary Table S2.** Clustering results from executing phyloPart on the maximum-likelihood tree containing Central America + control sequences, considering different percentile thresholds and selecting clusters with a reliability >90% (by Shimodaira-Hasegawa test).

| <b>Threshold percentile</b>           | <b>0.1</b> | <b>1<sup>st</sup></b> | <b>5<sup>th</sup></b> | <b>10<sup>th</sup></b> | <b>15<sup>th</sup></b> | <b>25<sup>th</sup></b> |
|---------------------------------------|------------|-----------------------|-----------------------|------------------------|------------------------|------------------------|
| <b>No. of clusters</b>                | 84         | 108                   | 141                   | 143                    | 135                    | 105                    |
| <b>Overall median</b>                 | 2 (2-3)    | 2 (2-3)               | 2 (2-3)               | 2 (2-3)                | 2 (2-5)                | 3 (2-5)                |
| <b>No. of sequences/ per/cluster</b>  |            |                       |                       |                        |                        |                        |
| <b>Absolute threshold</b>             | 0.02573    | 0.04085               | 0.05496               | 0.06248                | 0.06775                | 0.07558                |
| <b>(nucleotide substitution/site)</b> |            |                       |                       |                        |                        |                        |

**Supplementary Table S3.** Total number of Blast searched HIV-1 *pol* sequences included in the Central American phylogenetic analysis.

| <b>Country</b>                                | <b>No. of Blast sequences included in the analysis</b> | <b>Total no. of control sequences included in the analysis</b> | <b>Total no. of HIV-1 <i>pol</i> sequences in LANL</b> |
|-----------------------------------------------|--------------------------------------------------------|----------------------------------------------------------------|--------------------------------------------------------|
| <b>Central American neighboring countries</b> |                                                        |                                                                |                                                        |
| US                                            | 100                                                    | 317                                                            | 15,318                                                 |
| Canada                                        | 4                                                      | 4                                                              | 1,914                                                  |
| Mexico                                        | 0                                                      | 16                                                             | 57                                                     |
| Bahamas                                       | 0                                                      | 13                                                             | 14                                                     |
| Cuba                                          | 0                                                      | 6                                                              | 211                                                    |
| Dominican Republic                            | 0                                                      | 3                                                              | 157                                                    |
| Haiti                                         | 0                                                      | 15                                                             | 16                                                     |
| Jamaica                                       | 1                                                      | 9                                                              | 106                                                    |
| Trinidad & Tobago                             | 0                                                      | 5                                                              | 30                                                     |
| Argentina                                     | 0                                                      | 4                                                              | 3,480                                                  |
| Brazil                                        | 4                                                      | 30                                                             | 4,356                                                  |

|           |   |    |     |
|-----------|---|----|-----|
| Colombia  | 0 | 2  | 97  |
| Uruguay   | 0 | 1  | 26  |
| Venezuela | 6 | 10 | 489 |

**Non-Central**

**American**

**neighboring countries**

|                |   |    |       |
|----------------|---|----|-------|
| Albania        | 1 | 1  | 24    |
| Australia      | 1 | 16 | 353   |
| Azerbaijan     | 0 | 1  | 3     |
| Belgium        | 0 | 6  | 255   |
| China          | 1 | 13 | 1,360 |
| Cyprus         | 1 | 7  | 89    |
| Czech Republic | 0 | 36 | 765   |
| Denmark        | 0 | 11 | 344   |
| Georgia        | 0 | 2  | 11    |
| Germany        | 0 | 28 | 983   |
| Greece         | 0 | 5  | 86    |
| France         | 7 | 45 | 911   |

|                |     |      |        |
|----------------|-----|------|--------|
| Ireland        | 0   | 1    | 6      |
| Italy          | 2   | 48   | 2,805  |
| Japan          | 0   | 45   | 499    |
| Latvia         | 1   | 5    | 20     |
| Netherlands    | 0   | 5    | 111    |
| Portugal       | 1   | 7    | 297    |
| Russia         | 0   | 1    | 95     |
| Taiwan         | 0   | 1    | 355    |
| Thailand       | 0   | 3    | 47     |
| South Korea    | 1   | 8    | 328    |
| Spain          | 5   | 45   | 1,055  |
| Sweden         | 0   | 6    | 165    |
| Switzerland    | 0   | 3    | 486    |
| Ukraine        | 0   | 1    | 55     |
| United Kingdom | 1   | 19   | 1,130  |
| Yemen          | 0   | 3    | 9      |
| Total          | 137 | 807* | 38,918 |

Note: HIV-1 *pol* control sequences were obtained by BLAST searches in Los Alamos National Laboratory (LANL) in which the closest match to each of our Central American sequences were

retrieved. The analyses also included other sequences from Central American neighboring countries (Latin American and the Caribbean countries) and the rest of the world.

\*This total number includes the 67 Central American neighboring countries, including all available Haitian sequences and 740 sequences from the rest of the world.

**Supplementary Table S4.** Bayes factor between strict (null hypothesis) and relaxed molecular clock (alternative hypothesis).

| Model    | Clock <sup>a</sup> | Marginal likelihood | BF <sup>b</sup> |
|----------|--------------------|---------------------|-----------------|
| Constant | SC                 | - 24322.20          |                 |
|          | RC                 | - 24234.18          | 176.04          |
| BSP      | SC                 | -24315.539          |                 |
|          | RC                 | -24245.138          | 140.80          |

a. The selected molecular clock model ( $H_0$  = Null hypothesis,  $H_1$  = Alternative hypothesis) is highlighted in gray.

b. BF=Bayes Factor.  $6 > BF > 2$  indicates positive evidence against the null hypothesis;  $10 > BF > 6$  indicates strong evidence against the null hypothesis,  $BF > 10$  indicates very strong evidence against the null model.

**Supplementary Table S5.** Likelihood mapping analysis of HIV-1 *gag*, *pol* and *env* data sets.

| Study               | Data set *           | Star-like signal ** |
|---------------------|----------------------|---------------------|
|                     | <i>Env</i>           | 5.3                 |
|                     | <i>env1</i>          | 5.7                 |
|                     | <i>env2</i>          | 3.4                 |
| Gilbert et al. (11) | <i>env3</i>          | 5.6                 |
|                     | <i>env4</i>          | 5.6                 |
|                     | <i>env5</i>          | 6.1                 |
|                     | <i>gag</i>           | 16.6                |
|                     | <i>gag1</i>          | 18.8                |
| <hr/>               |                      |                     |
|                     | <i>Full data set</i> | 52.2                |
|                     | <i>Clade I</i>       | 41                  |
| Present study       | <i>Clade II</i>      | 26.9                |
|                     | <i>Clade III</i>     | 19.5                |
|                     | <i>Clade IV</i>      | 25.1                |
|                     | <i>Clade V</i>       | 31.9                |

\* *Env* and *gag* data sets are the ones used in the Gilbert et al. (11) paper. Full data set refers to the *pol* alignment analyzed in the present paper including 625 Central American



sequences and 740 randomly selected reference sequences. Clades I-V refer to five sub-alignments, each one including only sequences from one of the supported Central American clades shown in Figure 1.

\*\* Star-like signal is given as percentage of dots in the central area of the likelihood map (37) and represents the amount of phylogenetic noise in the data.

## SUPPLEMENTARY FIGURES

**Supplementary Figure S1. Maximum likelihood phylogenetic analysis of HIV-1 group M subtype B *pol* sequences.** Phylogenetic tree showing each strain labelled as follows: *subtype.country.year.accession number[or strainID for newly sampled strains]*. The tree is the same as the one given in Figure 1 and branches were colored according to the same color legend given in Figure 1.

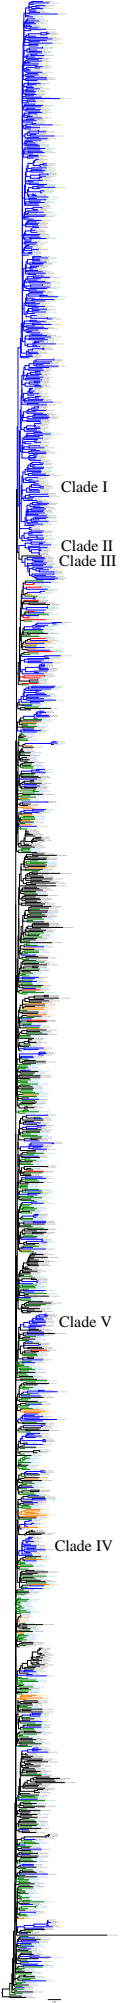

**Supplementary Figure S2. Phylogenetic trees of HIV-1 group M subtype B *pol* sequences using a sub-sample of the reference sequences.** Bayesian maximum clade credibility trees were inferred for five datasets, each one including the 21 available Haitian sequences and a random sub-sample of sequences from North America (42 strains), Central America (21 strains), South America (42 strains) and Europe/Oceania (42 strains). The numbers along the monophyletic branches correspond to approximate likelihood ratio test (aLRT) SH-like values. Branch lengths in nucleotide substitutions per site were scaled according to the bar at the bottom of each tree. The first tree is the same as the one shown in Figure 2.

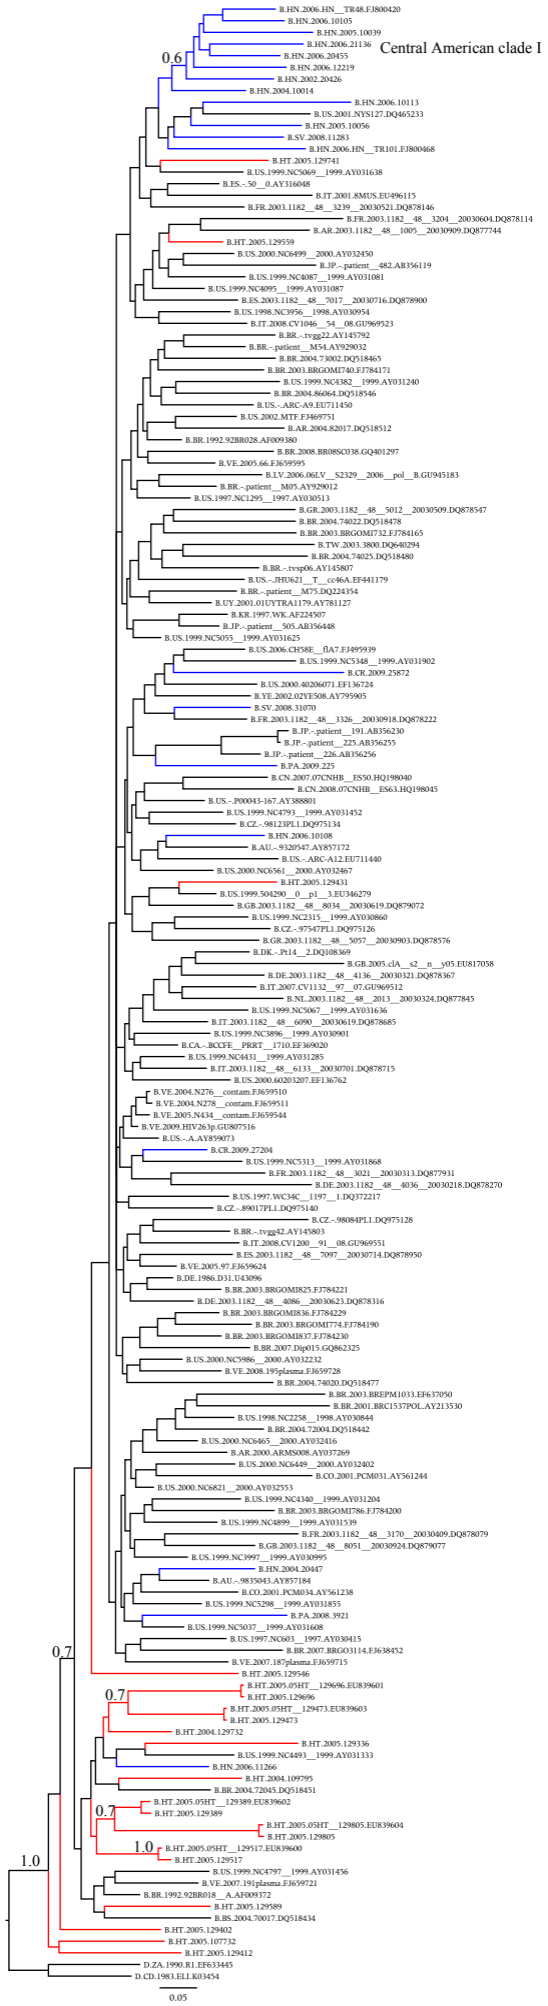

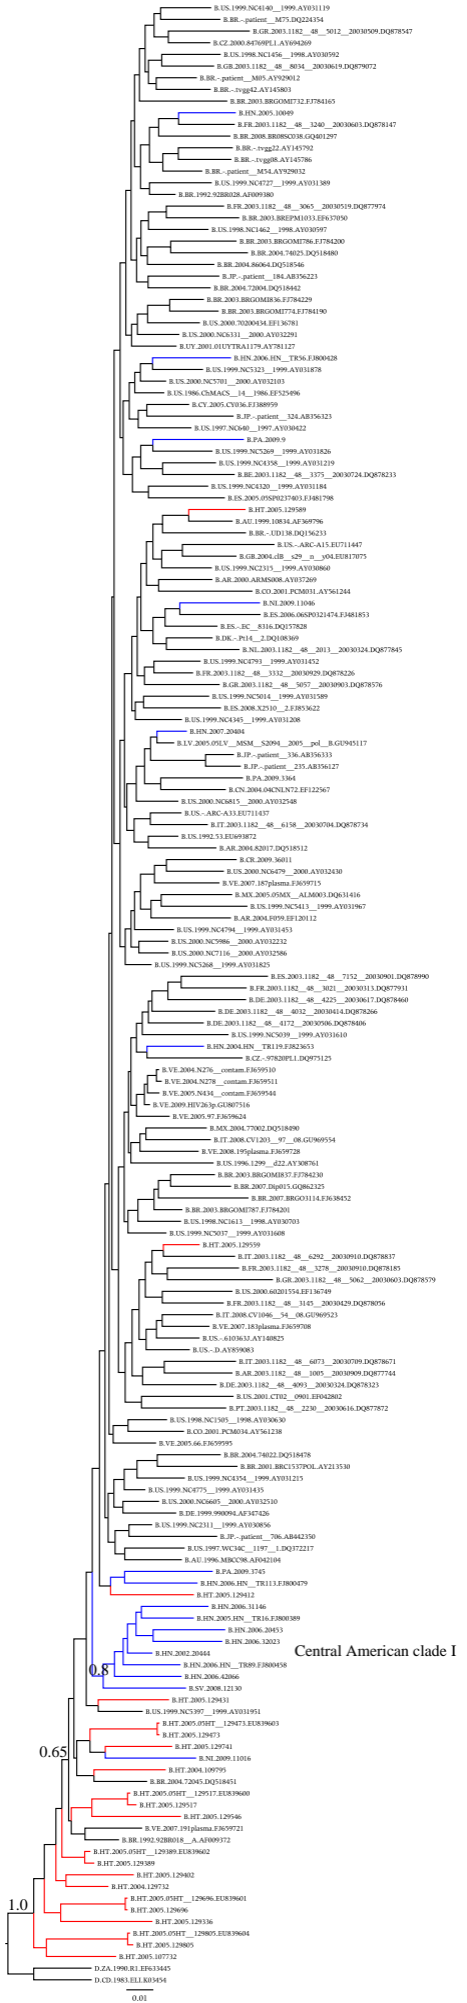

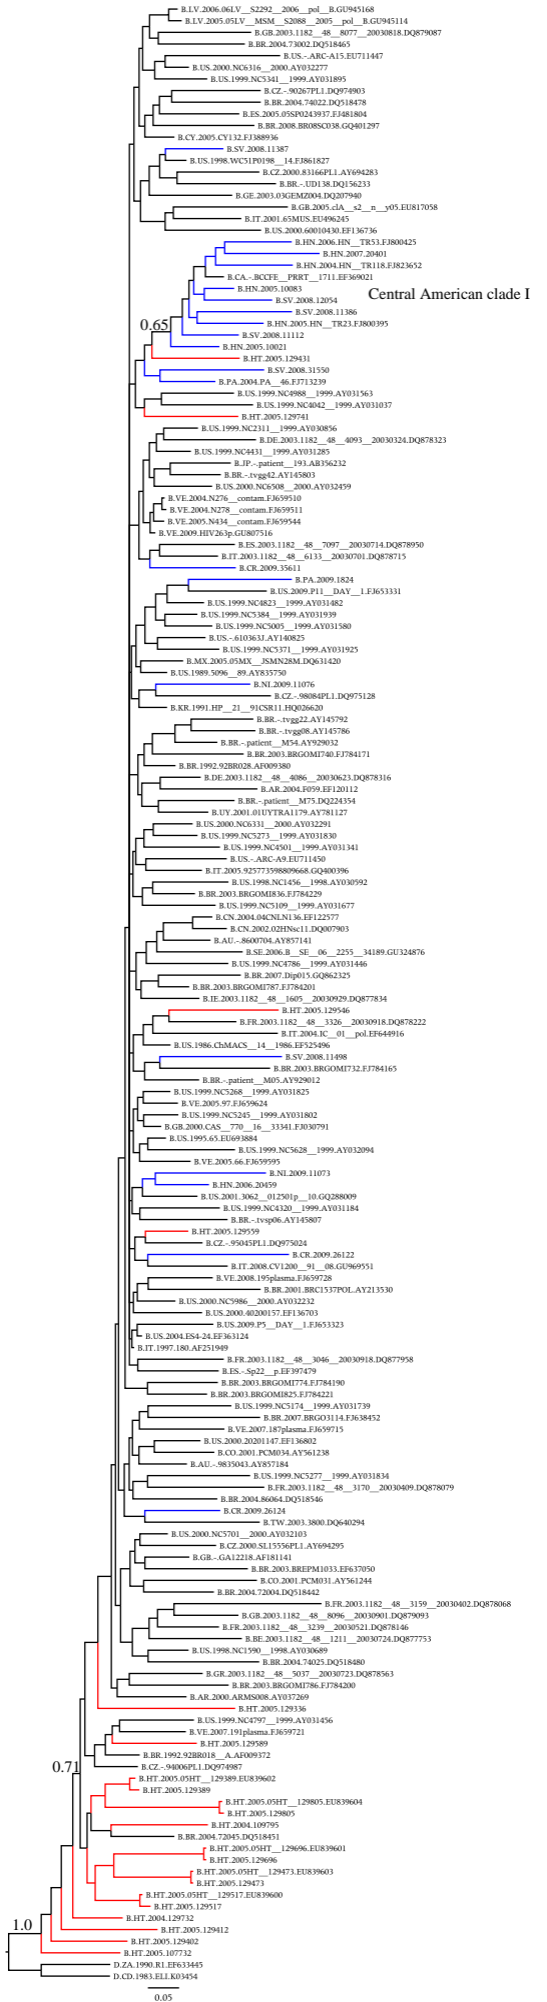

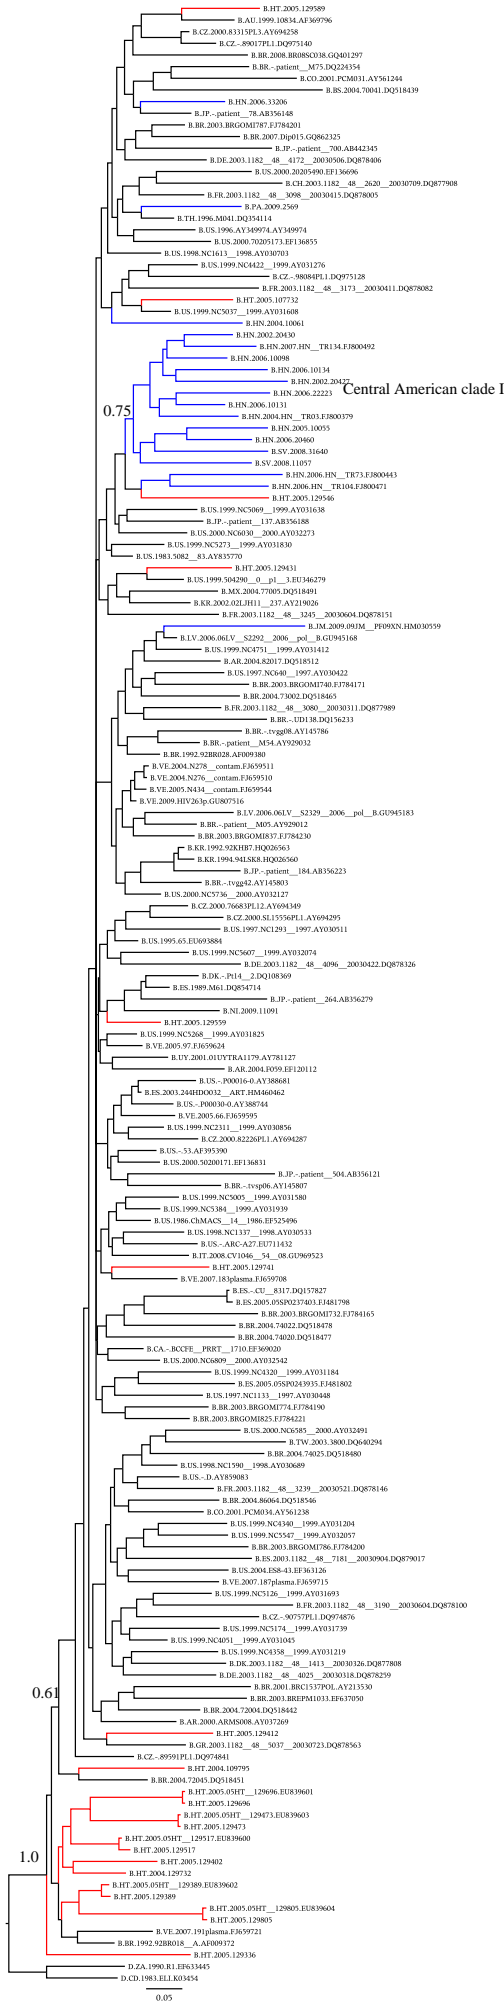



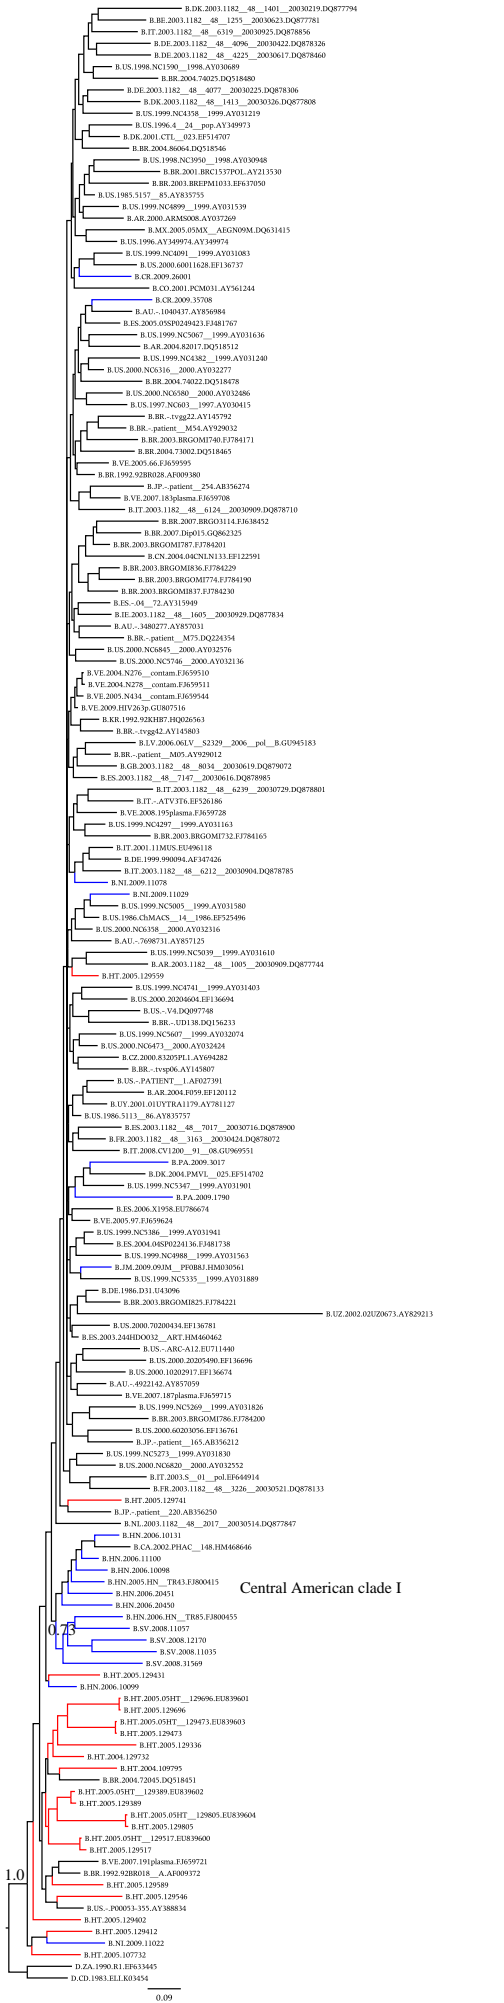

Supplement: JVI.01602-12_zjv999097785so1.pdf [file JVI.01602-12_zjv999097785so1.pdf]
